# Supplementary material for: Canagliflozin attenuates isoprenaline-induced cardiac oxidative stress by stimulating multiple antioxidant and anti-inflammatory signaling pathways
Source: PubMed Central journal article supplement (PMC7468124; doi:10.1038/s41598-020-71449-1), 2020-09-02
Supplement: 41598_2020_71449_MOESM1_ESM.pdf [file 41598_2020_71449_MOESM1_ESM.pdf]

## Supplementary material

### **Canagliflozin attenuates isoprenaline-induced cardiac oxidative stress by stimulating multiple antioxidant and anti-inflammatory signaling pathways**

Raquibul Hasan<sup>a\*</sup>, Shoumen Lasker<sup>b</sup>, Ahasanul Hasan<sup>a</sup>, Farzana Zerina<sup>a</sup>, Mushfera Zamila<sup>b</sup>, Faizul Islam Chowdhury<sup>b</sup>, Shariful Islam Nayan<sup>b</sup>, Md. Mizanur Rahman<sup>b</sup>, Ferdous Khan<sup>b</sup>, Nusrat Subhan<sup>b</sup> and Md. Ashraful Alam<sup>b\*</sup>

<sup>a</sup>Department of Pharmaceutical Sciences, College of Pharmacy, Mercer University, Atlanta, GA 30341, United States

<sup>b</sup>Department of Pharmaceutical Sciences, North South University, Dhaka 1229, Bangladesh

#### **\*Correspondence:**

Dr Md. Ashraful Alam, Associate Professor, Department of Pharmaceutical Sciences, North South University, Bashundhara, Dhaka, 1229, Bangladesh.

E-mail: [ashraful.alam@northsouth.edu](mailto:ashraful.alam@northsouth.edu)

And

Dr Raquibul Hasan, Assistant Professor, Department of Pharmaceutical Sciences, College of Pharmacy, Mercer University, 3001 Mercer University Drive, Atlanta, GA 30341, United States.

E-mail: [hasan\\_r@mercer.edu](mailto:hasan_r@mercer.edu)

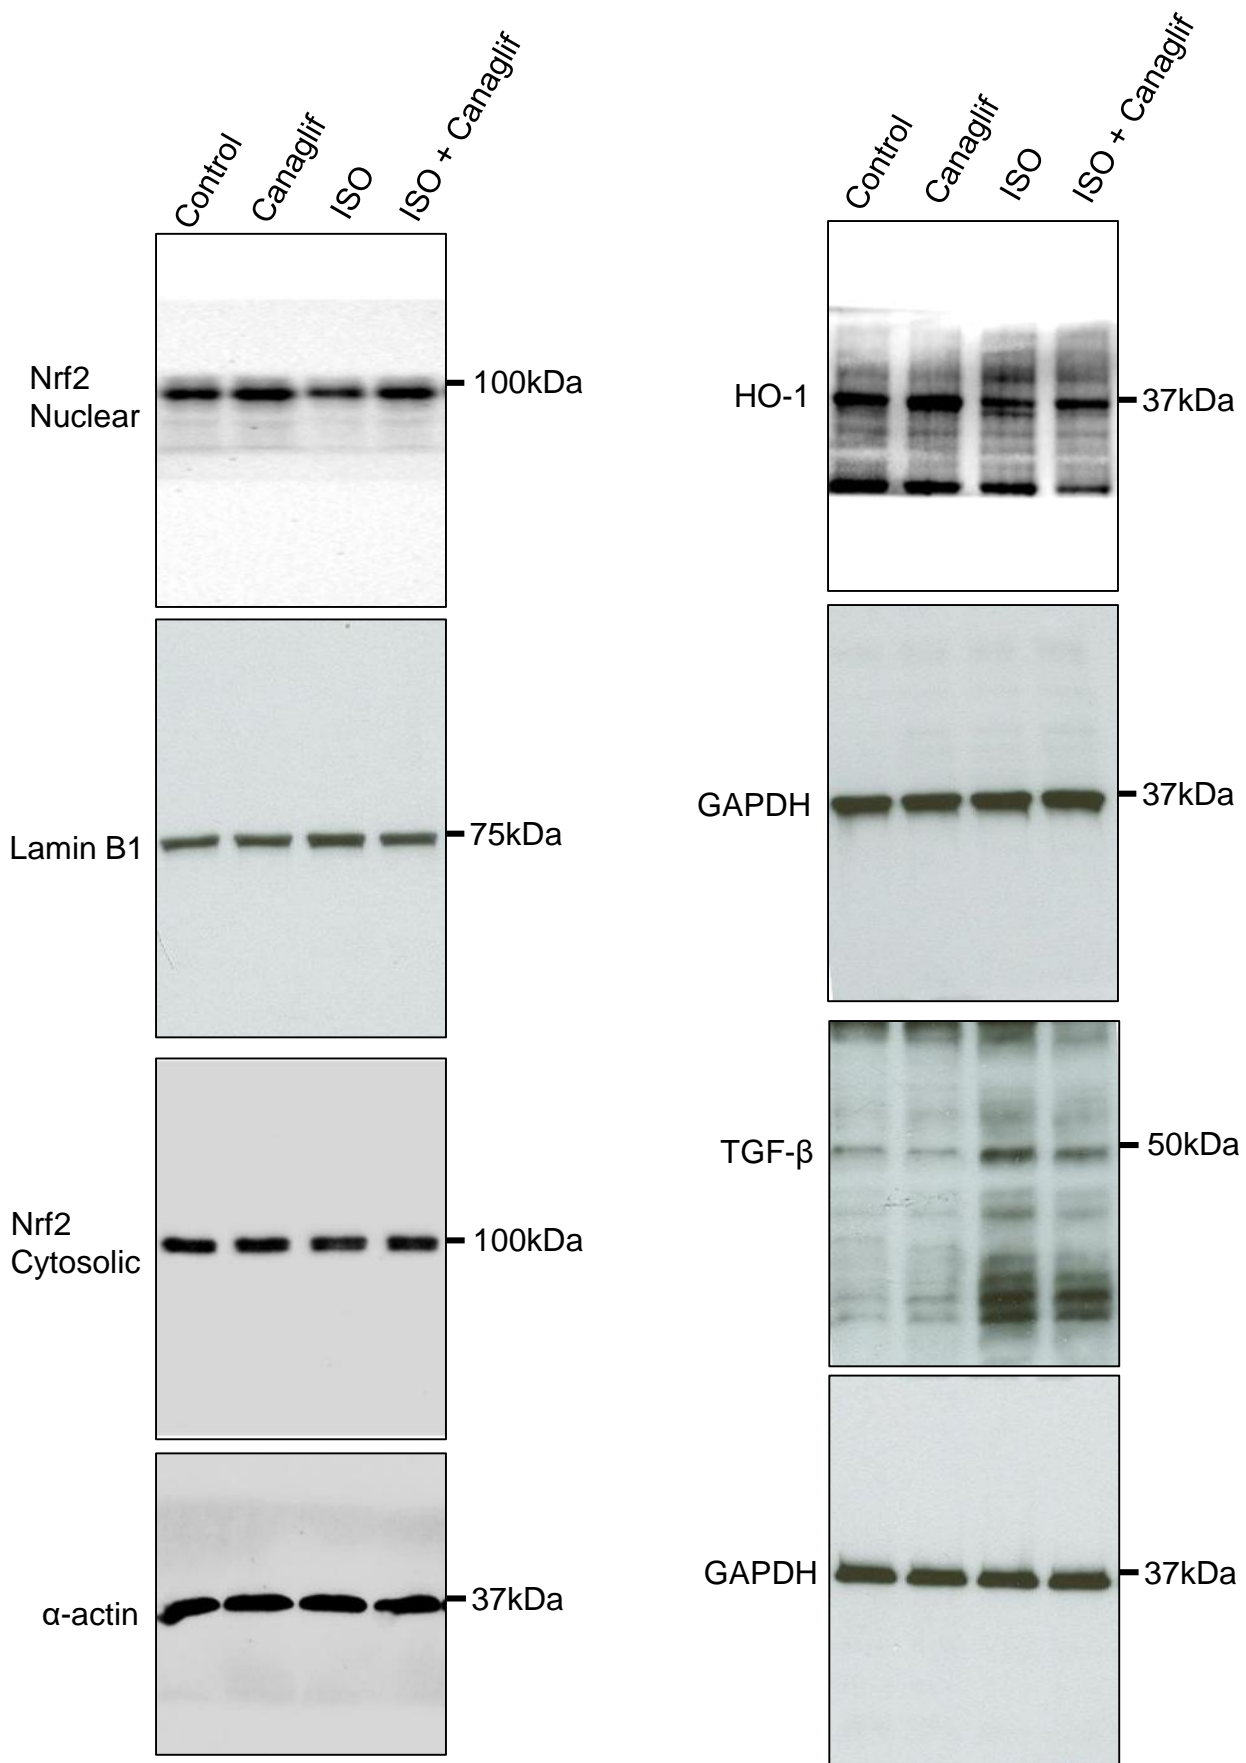

**Supplementary Figure 1:** Full-length Western blot images for Nrf2, Lamin B1,  $\alpha$ -actin, HO-1, GAPDH and TGF- $\beta$  representing Western blot images in Figure 5.

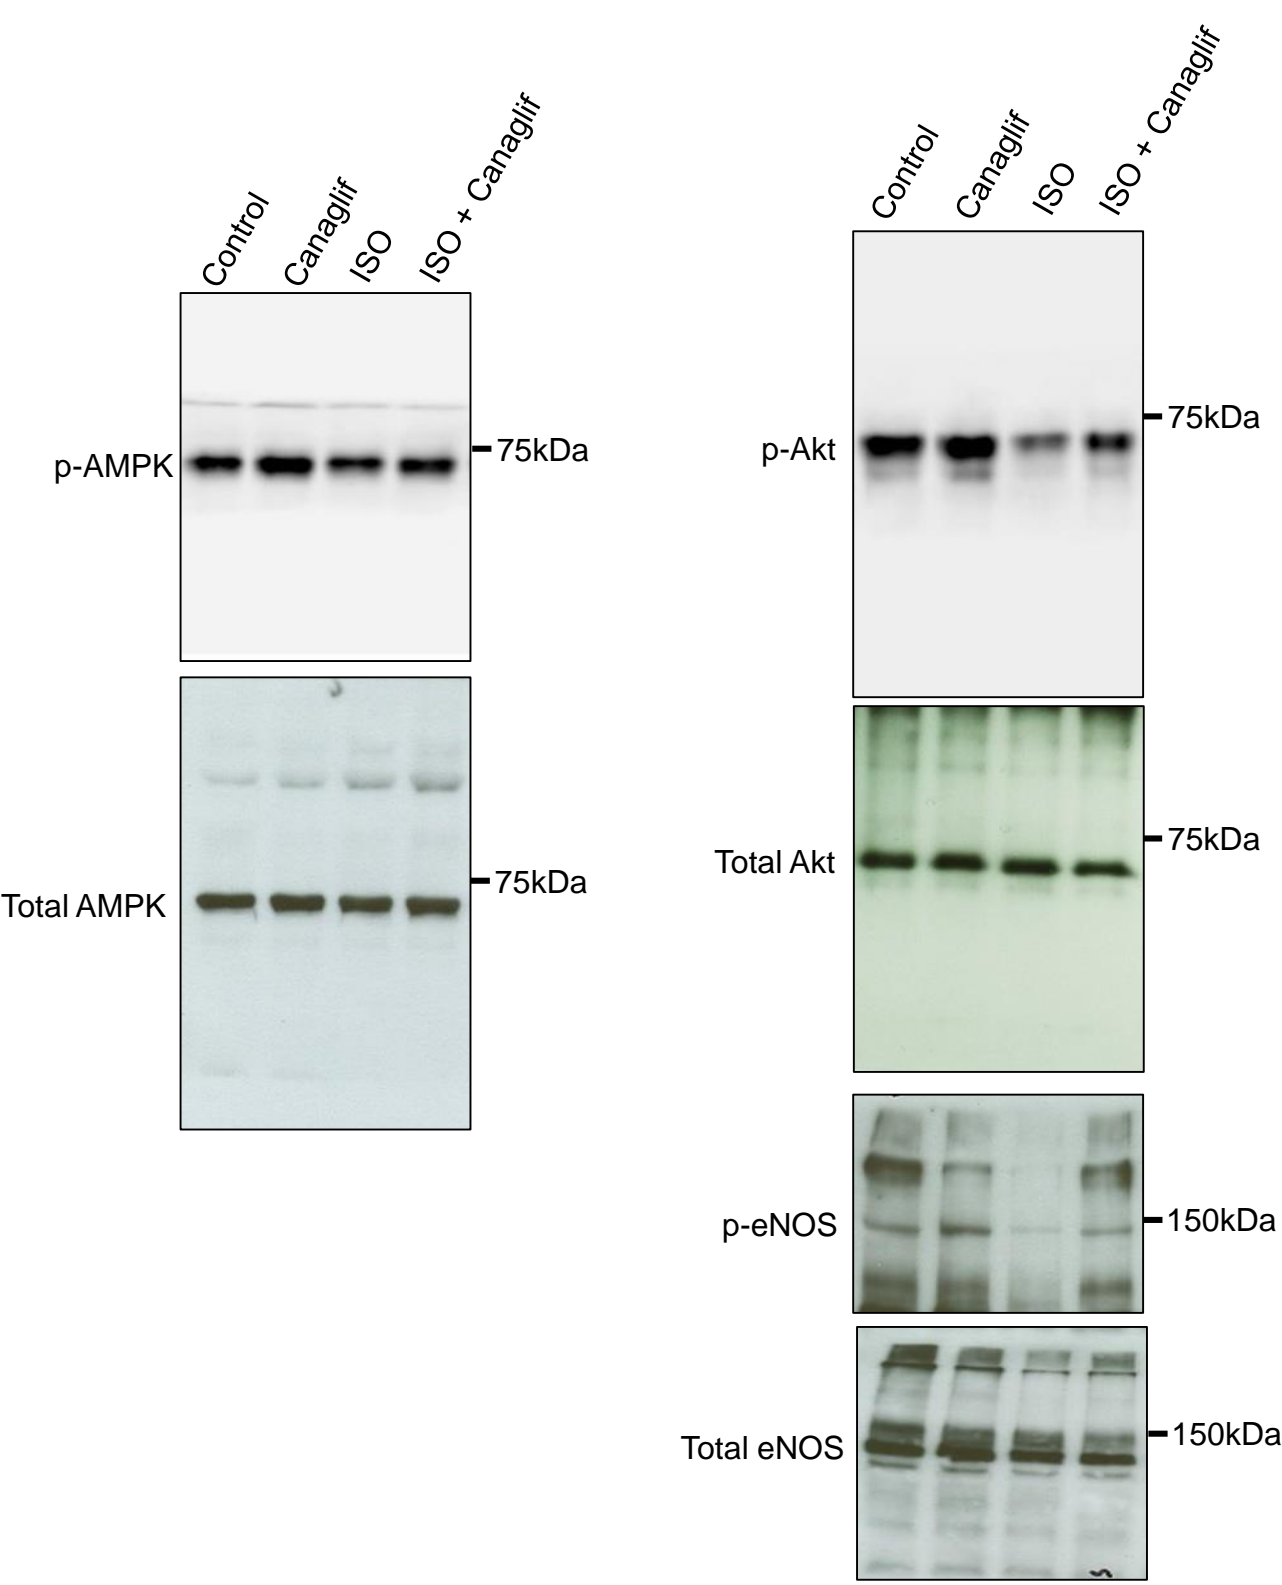

**Supplementary Figure 2:** Full-length Western blot images for p-AMPK, total AMPK, p-Akt, total Akt, p-eNOS and total eNOS representing Western blot images in Figure 6.

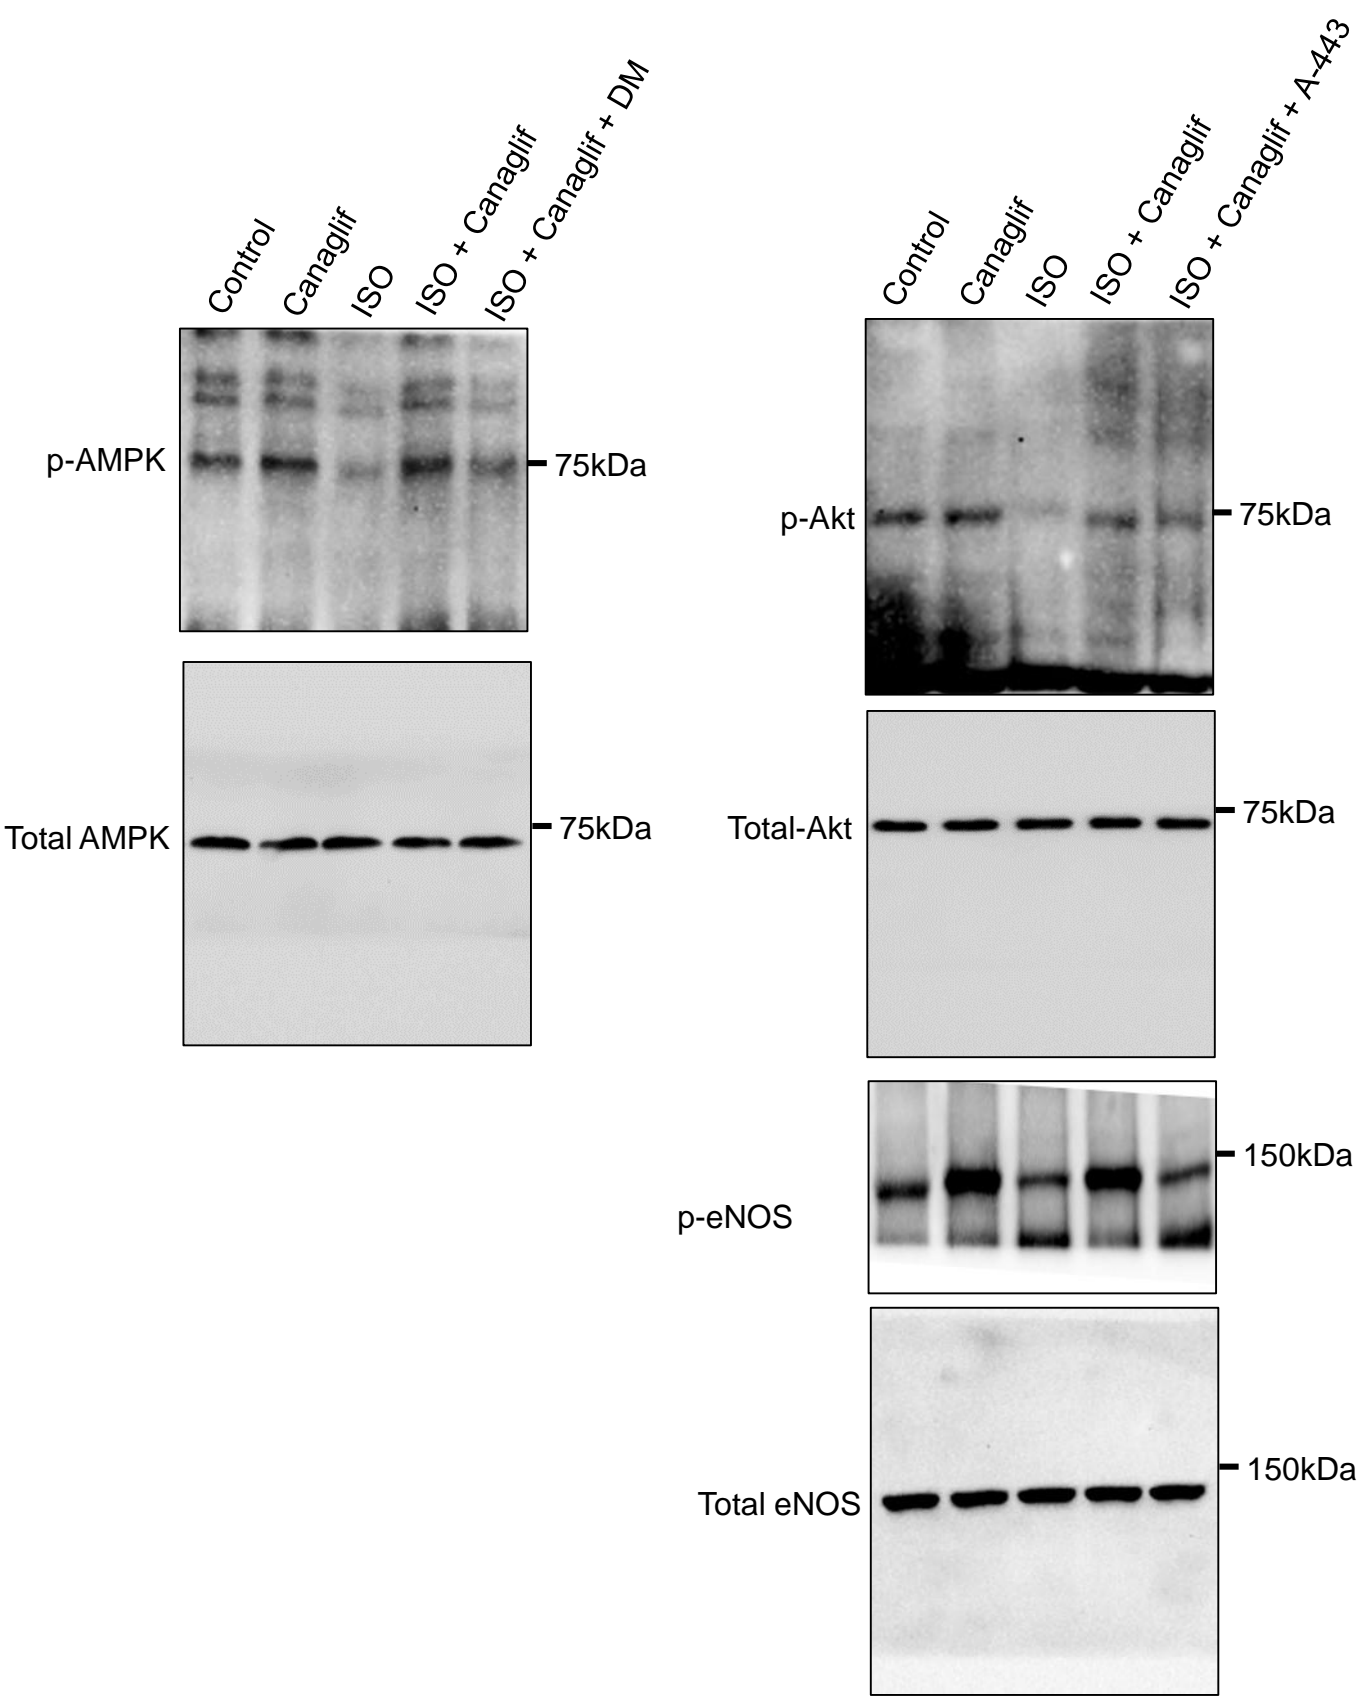

**Supplementary Figure 3:** Full-length Western blot images for p-AMPK, total AMPK, p-Akt, total Akt, p-eNOS and total eNOS representing Western blot images in Figure 7.

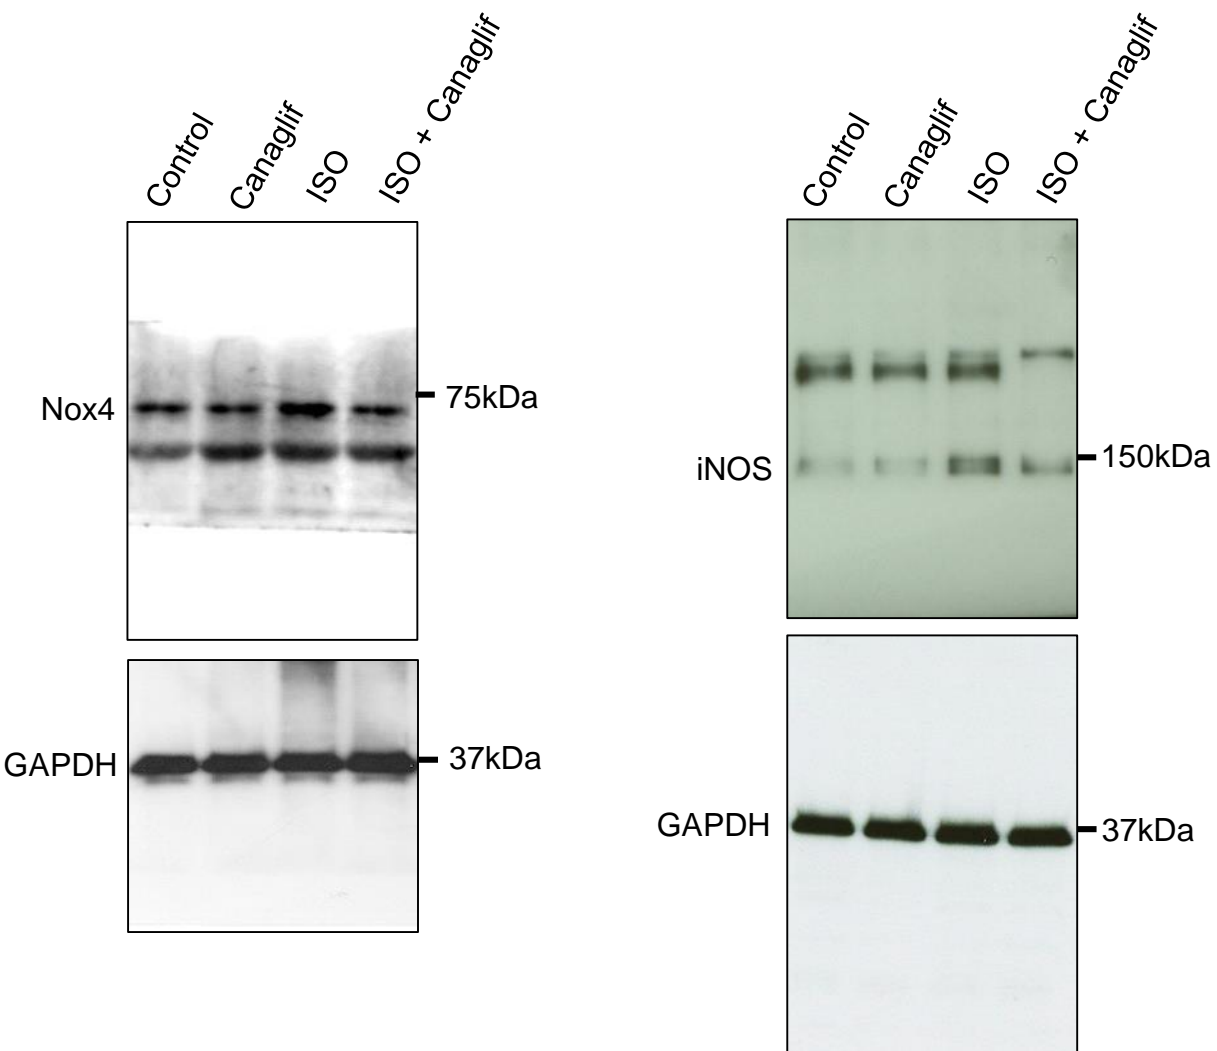

**Supplementary Figure 4:** Full-length Western blot images for Nox4, GAPDH and iNOS proteins representing Western blot images in Figure 8.

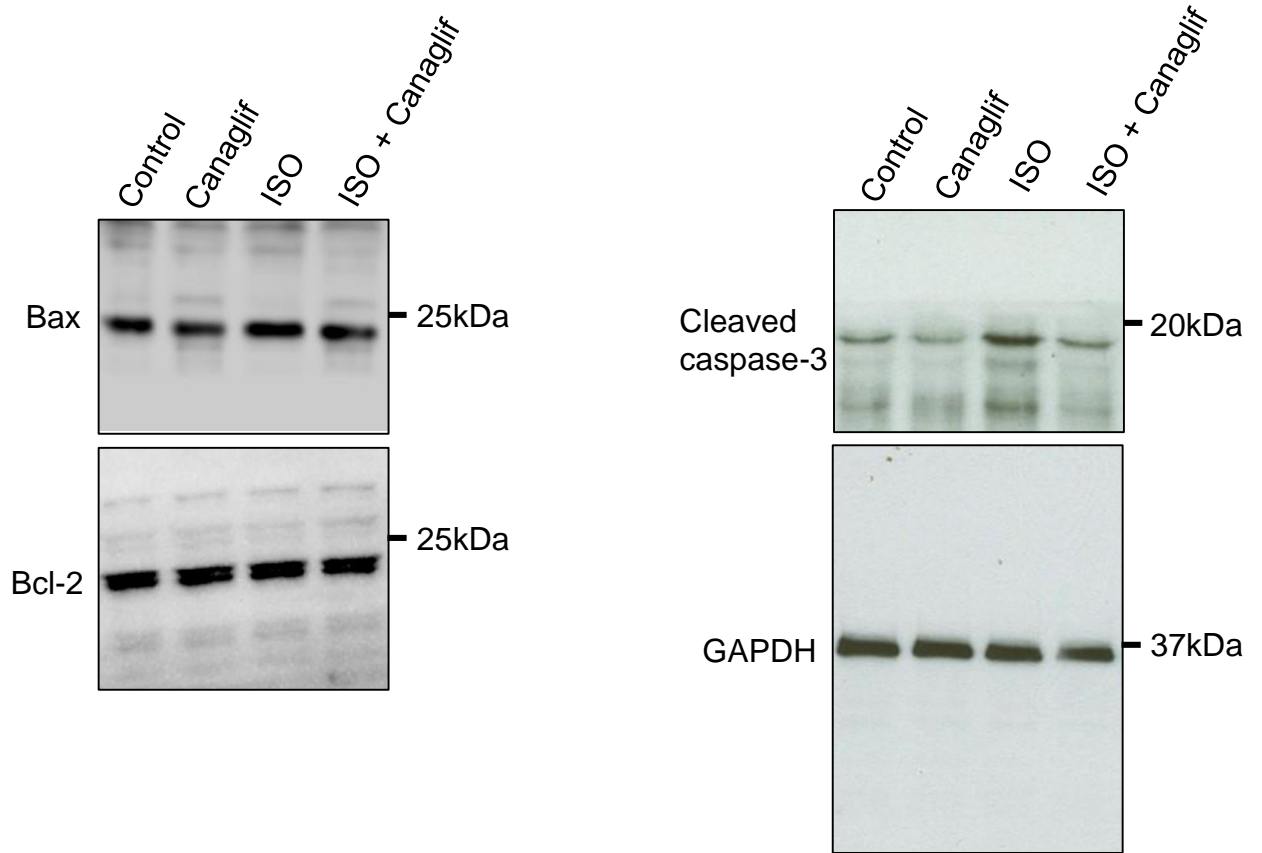

**Supplementary Figure 5:** Full-length Western blot images for Bax, Bcl-2, cleaved caspase-3 and GAPDH representing Western blot images in Figure 9.
